# Supplementary material
Source: publisher figshare collection journal article supplement (https://acs.figshare.com/ndownloader/files/3598929)
Supplement: Supplementary file 1 [file 3598929]

## Supporting Information

# Monte Carlo Simulations of Multigraft Homopolymers in Good Solvent

Daniel G. Angelescu and Per Linse

We here present graphical material on the end-to-end distance corresponding, and qualitatively equal, to those of the radius of gyration presented in Figures 3, 4, 6, 7, and 8 of the main article. Furthermore, selected data of fits to eq 13 of the radius of gyration and end-to-end distance are also provided.

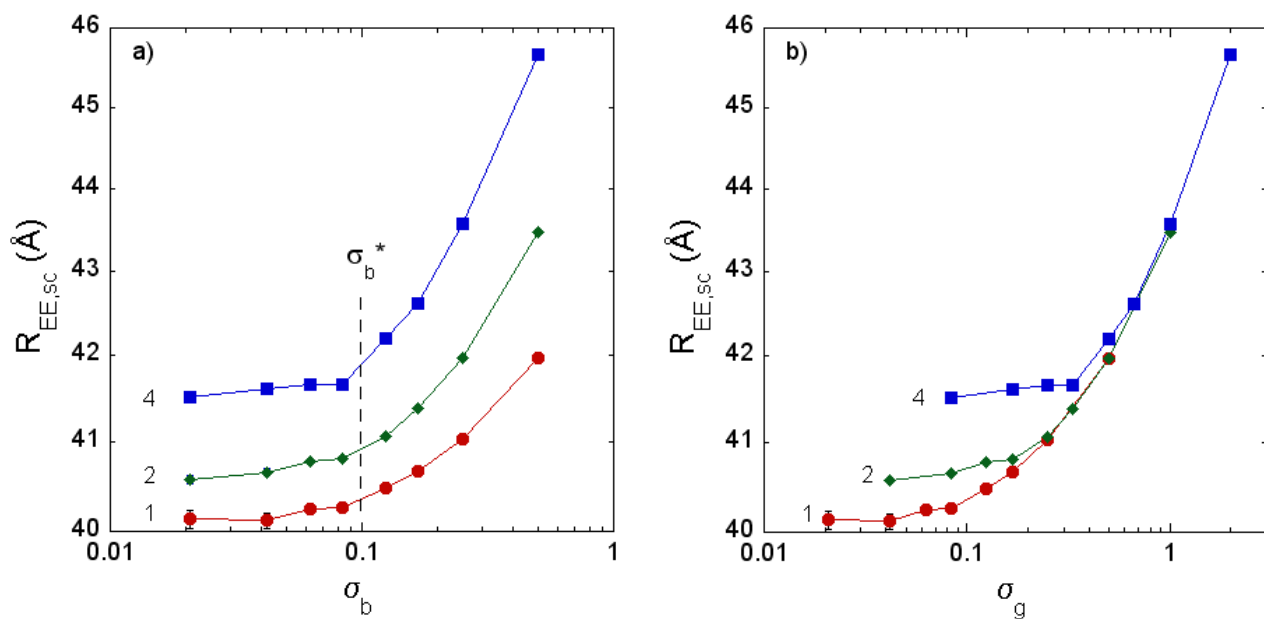

**Figure S1.** (a) End-to-end distance of side chains as  $R_{EE,sc}$  as a function of (a) the branching density  $\sigma_b$  and (b) the grafting density  $\sigma_g$  in a log-log representation for side-chain length  $N_{sc} = 24$  and branching multiplicity  $m = 1$  (●),  $m = 2$  (◆), and  $m = 4$  (■) (*cf.* Figure 3).

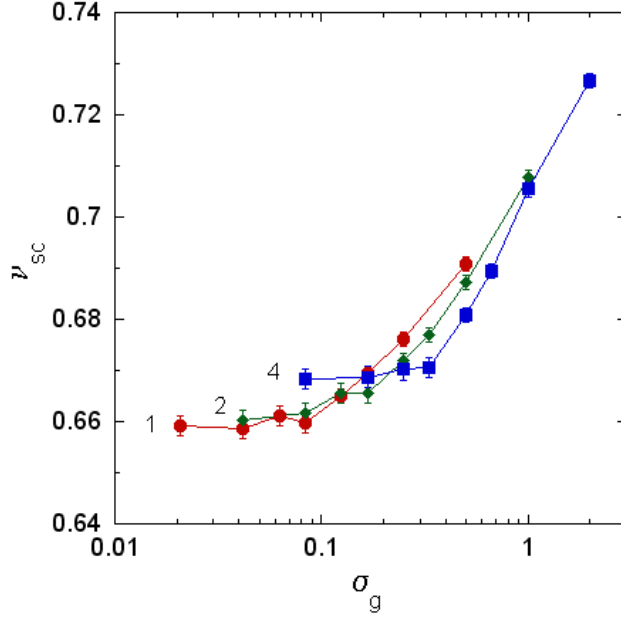

**Figure S2.** Exponent  $\nu_{sc}$  as fitted from  $R_{EE,sc} \sim N_{sc}^{\nu_{sc}}$  as a function of the grafting density  $\sigma_g$  in a log-lin representation for branching multiplicity  $m = 1$  ( $\bullet$ ),  $m = 2$  ( $\diamond$ ), and  $m = 4$  ( $\blacksquare$ ) (cf. Figure 4).

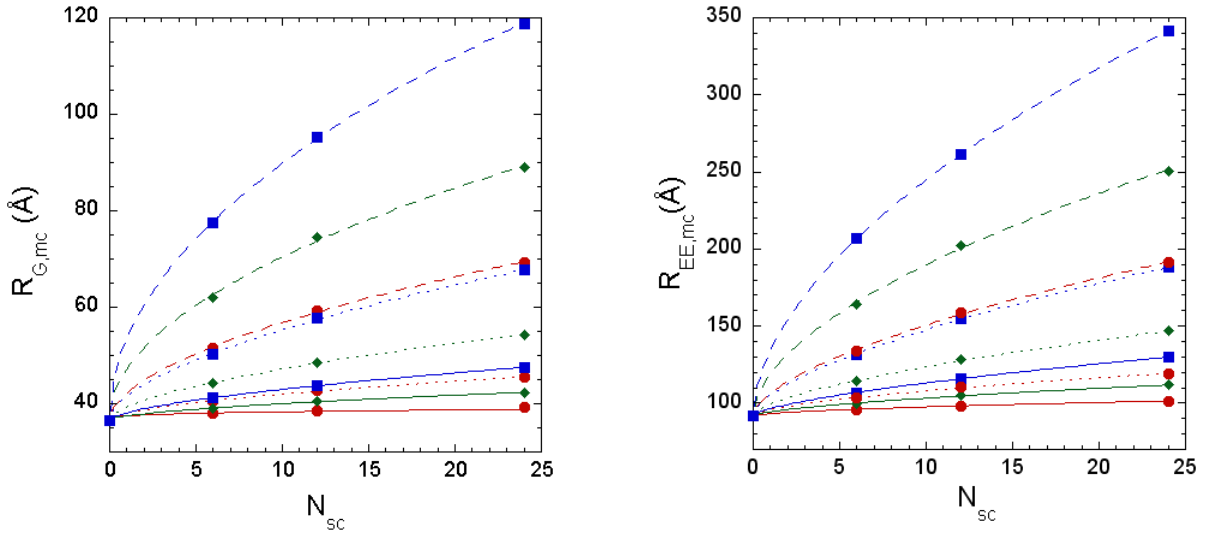

**Figure S3.** Root-mean-squared (a) radius of gyration  $R_{G,mc}$  and (b) end-to-end distance of the main chain  $R_{EE,mc}$  as a function of side-chain length  $N_{sc}$  in a lin-log representation for branching multiplicity  $m = 1$  ( $\bullet$ ),  $m = 2$  ( $\diamond$ ), and  $m = 4$  ( $\blacksquare$ ) at branching density  $\sigma_b = 0.041$  (solid curves),  $\sigma_b = 0.125$  (dotted curves), and  $\sigma_b = 0.5$  (dashed curves) and the best fits to eq 13 (curves).

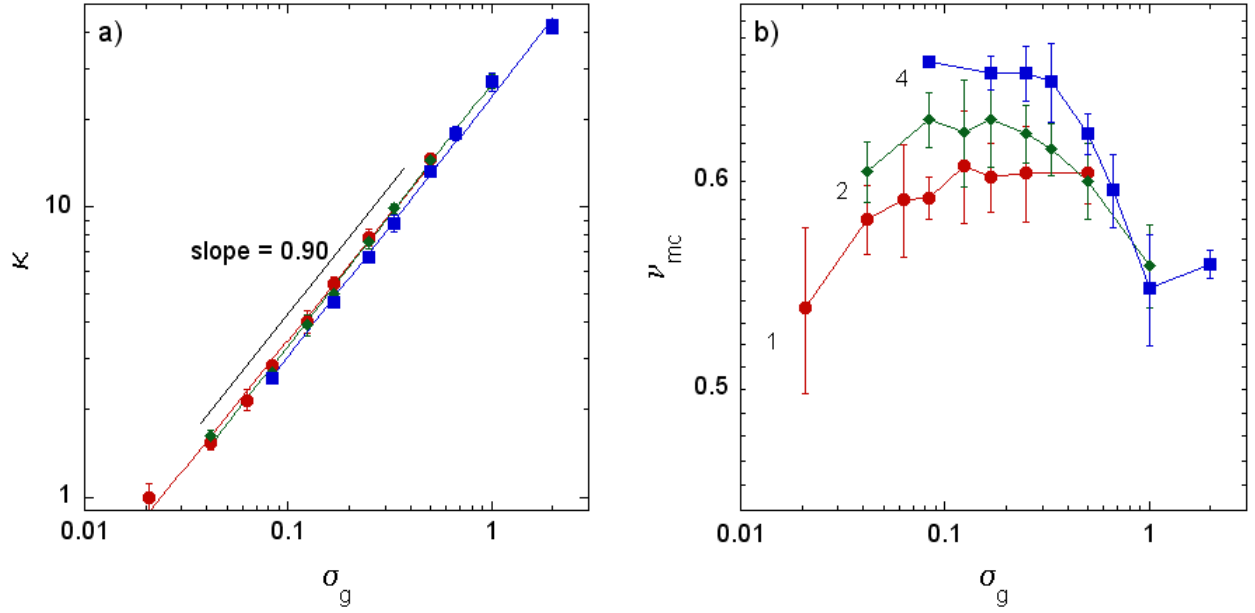

**Figure S4.** (a) Pre-exponential factor  $\kappa$  and (b) the exponential factor  $\nu_{mc}$  as a function of the grafting density  $\sigma_g$  in a log-log representation for branching multiplicity  $m = 1$  (●),  $m = 2$  (◆), and  $m = 4$  (■) (cf. Figure 6).

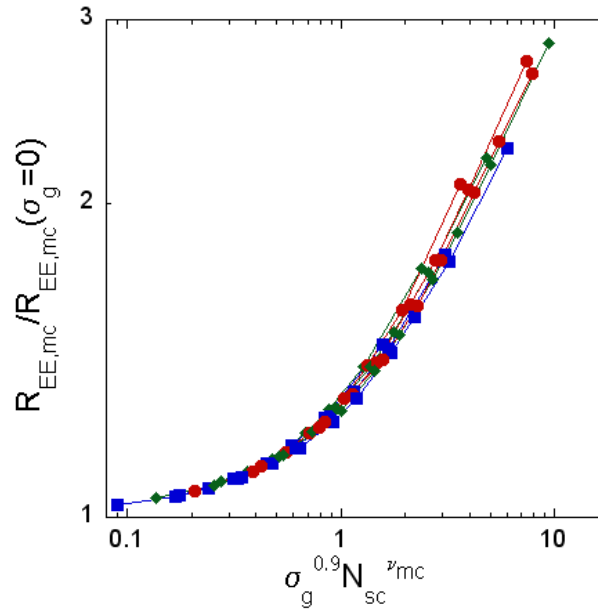

**Figure S5.** Normalized rms end-to-end distance of the main chain in a log-log representation as a function of  $\sigma_g^{0.9} N_{sc}^{\nu_{mc}}$  for side-chain length (■)  $N_{sc} = 6$ , (◆)  $N_{sc} = 12$ , and (●)  $N_{sc} = 24$  and  $(m, \nu_{mc}) = (1, 0.60)$ ,  $(2, 0.63)$ , and  $(4, 0.65)$  (cf. Figure 7).

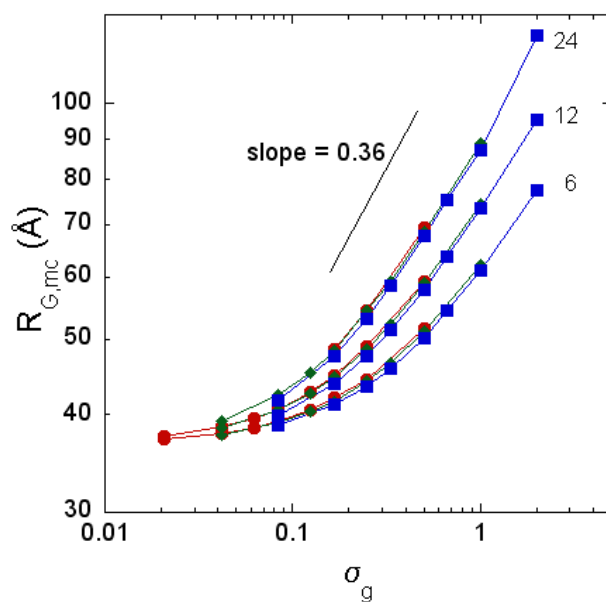

**Figure S6.** Radius of gyration of the main chain  $R_{G,mc}$  as function of the grafting density  $\sigma_g$  in a log-log representation for branching multiplicity  $m = 1$  (●),  $m = 2$  (◆), and  $m = 4$  (■) at indicated side-chain length  $N_{sc}$  (*cf.* Figure 8).
